# Supplementary material for: Comparative Transcriptome Analysis Provides Insights Into Yellow Rind Formation and Preliminary Mapping of the Clyr (Yellow Rind) Gene in Watermelon
Source: Front Plant Sci. 2020 Mar 11;11:192. doi: 10.3389/fpls.2020.00192 (PMC7078170; doi:10.3389/fpls.2020.00192)
Supplement: Table S6 — Top 10 enrichment terms in biological process, cellular component, and molecular function in each group. [file Table_6.xlsx]

## Sheet: Sheet1
WT4-0DAP vs WM102-0DAP.topGO_BP
GO.ID	Term	Annotated	Significant	Expected	KS
GO:0055047	generative cell mitosis	14	0	0.39	2.4e-07
GO:0033383	geranyl diphosphate metabolic process	24	1	0.67	1.2e-06
GO:0015074	DNA integration	41	0	1.14	3.4e-06
GO:0006075	(1->3)-beta-D-glucan biosynthetic process	25	1	0.69	4.3e-06
GO:0080027	response to herbivore	40	5	1.11	5e-06
GO:1901928	cadinene biosynthetic process	10	0	0.28	7e-06
GO:0019756	cyanogenic glycoside biosynthetic process	10	0	0.28	1.7e-05
GO:0010266	response to vitamin B1	18	0	0.5	4.7e-05
GO:0006885	regulation of pH	54	3	1.5	0.00014
GO:0016099	monoterpenoid biosynthetic process	31	0	0.86	0.00024
WT4-7DAP vs WM102-7DAP.topGO_BP
GO.ID	Term	Annotated	Significant	Expected	KS
GO:0055047	generative cell mitosis	14	0	0.27	1.8e-07
GO:0033383	geranyl diphosphate metabolic process	24	4	0.46	8.5e-07
GO:0015074	DNA integration	41	0	0.79	2.2e-06
GO:0006075	(1->3)-beta-D-glucan biosynthetic process	25	1	0.48	3.1e-06
GO:1901928	cadinene biosynthetic process	10	3	0.19	5.7e-06
GO:0019756	cyanogenic glycoside biosynthetic process	10	1	0.19	1.4e-05
GO:0010266	response to vitamin B1	18	1	0.35	3.5e-05
GO:0080027	response to herbivore	40	0	0.77	6.8e-05
GO:0016099	monoterpenoid biosynthetic process	31	0	0.6	0.00019
GO:0002213	defense response to insect	85	5	1.64	0.00029
WT4-14DAP vs WM102-14DAP.topGO_BP
GO.ID	Term	Annotated	Significant	Expected	KS
GO:0055047	generative cell mitosis	14	2	0.93	4.9e-08
GO:0015074	DNA integration	41	4	2.72	5.8e-07
GO:0033383	geranyl diphosphate metabolic process	24	3	1.59	4.6e-06
GO:1901928	cadinene biosynthetic process	10	1	0.66	1.9e-05
GO:0010266	response to vitamin B1	18	2	1.19	2.4e-05
GO:0019756	cyanogenic glycoside biosynthetic process	10	1	0.66	4.3e-05
GO:0006885	regulation of pH	54	8	3.58	8e-05
GO:0080027	response to herbivore	40	5	2.65	8.7e-05
GO:0006075	(1->3)-beta-D-glucan biosynthetic process	25	1	1.66	0.00012
GO:0016099	monoterpenoid biosynthetic process	31	1	2.06	0.00014
WT4_7DAP vs _WT4_0DAP.topGO_BP
GO.ID	Term	Annotated	Significant	Expected	KS
GO:0010200	response to chitin	920	272	174.83	1.2e-10
GO:0002679	respiratory burst involved in defense response	312	111	59.29	5.8e-09
GO:0009611	response to wounding	928	252	176.35	1.7e-06
GO:0050832	defense response to fungus	1044	273	198.4	6.9e-06
GO:0009765	photosynthesis, light harvesting	51	24	9.69	9.7e-06
GO:0033383	geranyl diphosphate metabolic process	24	6	4.56	1.2e-05
GO:0009825	multidimensional cell growth	405	114	76.96	1.5e-05
GO:0009624	response to nematode	311	100	59.1	2.1e-05
GO:0045471	response to ethanol	19	6	3.61	2.5e-05
GO:0010413	glucuronoxylan metabolic process	327	103	62.14	2.5e-05
WT4_14DAP vs _WT4_7DAP.topGO_BP
GO.ID	Term	Annotated	Significant	Expected	KS
GO:0006270	DNA replication initiation	76	56	21.01	1.1e-17
GO:0008283	cell proliferation	455	195	125.81	6.5e-16
GO:0006275	regulation of DNA replication	153	78	42.31	5.1e-12
GO:0006084	acetyl-CoA metabolic process	165	85	45.62	1e-10
GO:0010389	regulation of G2/M transition of mitotic cell cycle	66	42	18.25	2.3e-10
GO:0000911	cytokinesis by cell plate formation	324	143	89.59	1.4e-09
GO:0051567	histone H3-K9 methylation	251	109	69.4	3.9e-09
GO:0001510	RNA methylation	264	99	73	3.9e-08
GO:0016132	brassinosteroid biosynthetic process	273	120	75.49	5.2e-08
GO:0006306	DNA methylation	229	87	63.32	7.8e-08
WT4-0DAP vs WM102-0DAP.topGO_CC
GO.ID	Term	Annotated	Significant	Expected	KS
GO:0016021	integral component of membrane	1629	50	42.42	1.1e-07
GO:0000148	1,3-beta-D-glucan synthase complex	25	1	0.65	4.4e-06
GO:0031209	SCAR complex	8	1	0.21	0.00047
GO:0005801	cis-Golgi network	28	1	0.73	0.00061
GO:0009505	plant-type cell wall	765	22	19.92	0.00309
GO:0044423	virion part	9	0	0.23	0.00662
GO:0031969	chloroplast membrane	188	9	4.9	0.00687
GO:0030532	small nuclear ribonucleoprotein complex	9	0	0.23	0.00805
GO:0000808	origin recognition complex	7	0	0.18	0.01164
GO:0005819	spindle	111	4	2.89	0.02069
WT4-7DAP vs WM102-7DAP.topGO_CC
GO.ID	Term	Annotated	Significant	Expected	KS
GO:0016021	integral component of membrane	1629	30	30.87	3.4e-07
GO:0000148	1,3-beta-D-glucan synthase complex	25	1	0.47	3.2e-06
GO:0031209	SCAR complex	8	0	0.15	0.00041
GO:0005801	cis-Golgi network	28	0	0.53	0.0005
GO:0009505	plant-type cell wall	765	19	14.5	0.00207
GO:0044423	virion part	9	0	0.17	0.00592
GO:0030532	small nuclear ribonucleoprotein complex	9	0	0.17	0.00707
GO:0000808	origin recognition complex	7	0	0.13	0.01052
GO:0031969	chloroplast membrane	188	5	3.56	0.01644
GO:0030095	chloroplast photosystem II	14	2	0.27	0.0194
WT4-14DAP vs WM102-14DAP.topGO_CC
GO.ID	Term	Annotated	Significant	Expected	KS
GO:0009505	plant-type cell wall	765	98	50.07	7.3e-10
GO:0016021	integral component of membrane	1629	113	106.61	6.6e-08
GO:0000148	1,3-beta-D-glucan synthase complex	25	1	1.64	0.00012
GO:0031209	SCAR complex	8	1	0.52	0.00099
GO:0005801	cis-Golgi network	28	1	1.83	0.00128
GO:0046658	anchored component of plasma membrane	184	27	12.04	0.00191
GO:0031225	anchored component of membrane	276	41	18.06	0.00221
GO:0005874	microtubule	145	29	9.49	0.00428
GO:0005576	extracellular region	1817	188	118.91	0.00455
GO:0048046	apoplast	796	91	52.09	0.00713
WT4_7DAP vs _WT4_0DAP.topGO_CC
GO.ID	Term	Annotated	Significant	Expected	KS
GO:0016021	integral component of membrane	1629	343	301.84	2.4e-10
GO:0009505	plant-type cell wall	765	180	141.75	2.4e-06
GO:0009522	photosystem I	29	14	5.37	9.8e-05
GO:0048046	apoplast	796	204	147.49	0.00018
GO:0000148	1,3-beta-D-glucan synthase complex	25	3	4.63	0.00026
GO:0005886	plasma membrane	4158	860	770.44	0.00031
GO:0071944	cell periphery	5259	1092	974.45	0.00104
GO:0009706	chloroplast inner membrane	95	30	17.6	0.00186
GO:0009506	plasmodesma	1947	418	360.76	0.00194
GO:0005576	extracellular region	1817	434	336.68	0.00251
WT4_14DAP vs _WT4_7DAP.topGO_CC
GO.ID	Term	Annotated	Significant	Expected	KS
GO:0009506	plasmodesma	1947	681	537.18	2.4e-12
GO:0022625	cytosolic large ribosomal subunit	144	69	39.73	4.7e-11
GO:0005730	nucleolus	742	251	204.72	5.4e-11
GO:0009505	plant-type cell wall	765	285	211.06	1.8e-09
GO:0046658	anchored component of plasma membrane	184	91	50.77	1.5e-08
GO:0005886	plasma membrane	4158	1318	1147.19	1.9e-08
GO:0000786	nucleosome	49	26	13.52	1e-07
GO:0042555	MCM complex	7	7	1.93	2.9e-06
GO:0048046	apoplast	796	284	219.62	7.3e-06
GO:0022627	cytosolic small ribosomal subunit	79	33	21.8	2.2e-05
WT4-0DAP vs WM102-0DAP.topGO_MF
GO.ID	Term	Annotated	Significant	Expected	KS
GO:0008270	zinc ion binding	842	15	23.39	3e-06
GO:0003843	1,3-beta-D-glucan synthase activity	25	1	0.69	5.5e-06
GO:0047461	(+)-delta-cadinene synthase activity	10	0	0.28	8.1e-06
GO:0034009	isoprene synthase activity	7	0	0.19	0.0014
GO:0016762	xyloglucan:xyloglucosyl transferase activity	32	2	0.89	0.0019
GO:0051537	2 iron, 2 sulfur cluster binding	28	0	0.78	0.002
GO:0034768	(E)-beta-ocimene synthase activity	12	0	0.33	0.0023
GO:0019239	deaminase activity	14	1	0.39	0.0023
GO:0042887	amide transmembrane transporter activity	44	5	1.22	0.0025
GO:0047701	beta-L-arabinosidase activity	21	1	0.58	0.0029
WT4-7DAP vs WM102-7DAP.topGO_MF
GO.ID	Term	Annotated	Significant	Expected	KS
GO:0003843	1,3-beta-D-glucan synthase activity	25	1	0.48	3.9e-06
GO:0047461	(+)-delta-cadinene synthase activity	10	3	0.19	6.6e-06
GO:0008270	zinc ion binding	842	7	16.26	1.8e-05
GO:0034009	isoprene synthase activity	7	0	0.14	0.0013
GO:0051537	2 iron, 2 sulfur cluster binding	28	3	0.54	0.0017
GO:0034768	(E)-beta-ocimene synthase activity	12	0	0.23	0.002
GO:0043546	molybdopterin cofactor binding	6	0	0.12	0.0026
GO:0008825	cyclopropane-fatty-acyl-phospholipid synthase activity	6	0	0.12	0.0029
GO:0047251	thiohydroximate beta-D-glucosyltransferase activity	12	1	0.23	0.0029
GO:0005544	calcium-dependent phospholipid binding	11	0	0.21	0.0033
WT4-14DAP vs WM102-14DAP.topGO_MF
GO.ID	Term	Annotated	Significant	Expected	KS
GO:0008270	zinc ion binding	842	44	56.21	1.1e-05
GO:0047461	(+)-delta-cadinene synthase activity	10	1	0.67	2.2e-05
GO:0008447	L-ascorbate oxidase activity	35	9	2.34	0.00013
GO:0003843	1,3-beta-D-glucan synthase activity	25	1	1.67	0.00015
GO:0016762	xyloglucan:xyloglucosyl transferase activity	32	7	2.14	0.00127
GO:0034639	L-amino acid efflux transmembrane transporter activity	23	6	1.54	0.0019
GO:0052716	hydroquinone:oxygen oxidoreductase activity	13	7	0.87	0.00201
GO:0034009	isoprene synthase activity	7	0	0.47	0.00244
GO:0016709	oxidoreductase activity, acting on paired donors, with incorporation or reduction of molecular oxygen, NAD(P)H as one donor, and incorporation of one atom of oxygen	181	25	12.08	0.0026
GO:0080039	xyloglucan:xyloglucosyl transferase activity	25	6	1.67	0.00288
WT4_7DAP vs _WT4_0DAP.topGO_MF
GO.ID	Term	Annotated	Significant	Expected	KS
GO:0003700	transcription factor activity, sequence-specific DNA binding	1184	330	225.75	1.6e-09
GO:0008447	L-ascorbate oxidase activity	35	17	6.67	6.6e-06
GO:0016168	chlorophyll binding	33	16	6.29	0.0001
GO:0052716	hydroquinone:oxygen oxidoreductase activity	13	9	2.48	0.00017
GO:0047461	(+)-delta-cadinene synthase activity	10	2	1.91	0.00032
GO:0003843	1,3-beta-D-glucan synthase activity	25	3	4.77	0.00035
GO:0046872	metal ion binding	2528	517	482.01	0.00063
GO:0016762	xyloglucan:xyloglucosyl transferase activity	32	9	6.1	0.0014
GO:0016709	oxidoreductase activity, acting on paired donors, with incorporation or reduction of molecular oxygen, NAD(P)H as one donor, and incorporation of one atom of oxygen	181	46	34.51	0.00229
GO:0043565	sequence-specific DNA binding	434	117	82.75	0.00302
WT4_14DAP vs _WT4_7DAP.topGO_MF
GO.ID	Term	Annotated	Significant	Expected	KS
GO:0003735	structural constituent of ribosome	321	120	88.9	6.8e-09
GO:0015250	water channel activity	34	23	9.42	1.8e-05
GO:0008574	ATP-dependent microtubule motor activity, plus-end-directed	16	12	4.43	1.8e-05
GO:0008017	microtubule binding	84	40	23.26	3e-05
GO:0047268	galactinol-raffinose galactosyltransferase activity	6	6	1.66	0.00019
GO:0031625	ubiquitin protein ligase binding	82	41	22.71	0.00022
GO:0004190	aspartic-type endopeptidase activity	49	25	13.57	0.00038
GO:0016762	xyloglucan:xyloglucosyl transferase activity	32	17	8.86	0.00038
GO:0016301	kinase activity	1490	463	412.67	0.00039
GO:0003843	1,3-beta-D-glucan synthase activity	25	10	6.92	0.00044
